# Supplementary material
Source: PubMed Central journal article supplement (PMC6583870)
Supplement: NIHMS1033255-supplement-Appendix.pdf [file NIHMS1033255-supplement-Appendix.pdf]

## Appendix

### Drug overdose deaths

Mortality files were generated at NCHS by extracting information recorded from death certificates filed in the 50 states and the District of Columbia. Deaths were classified by NCHS using the International Classification of Diseases, Tenth Revision (ICD–10). Drug overdose deaths were defined as having an ICD–10 underlying cause-of-death code of X40–X44, X60–X64, X85, or Y10–Y14. Drugs involved were determined using ICD–10 multiple cause-of-death codes of T40.1 for heroin, T40.2, T40.3, or T40.4 for prescription opioids, T40.6 for unspecified narcotics, and T50.9 for unspecified drug(s).

Variation in the reporting of drug-specific information on death certificates across states affects state-level drug-specific death rates. In addition, NCHS suggests that if an underlying cause has less than twenty deaths in a state, it should not be used for calculating death rate for analysis due to potential unreliability. (National Center for Health Statistics. Compressed Mortality File, 1999–2011, CD-ROM Series 20, No. 2Q. July 28, 2014. [http://www.cdc.gov/nchs/data/mortab/1999-2011CMFDocumentation\\_8\\_5\\_14.pdf](http://www.cdc.gov/nchs/data/mortab/1999-2011CMFDocumentation_8_5_14.pdf), Accessed October 30, 2015.) To address this and the concern that any potential changes in these reporting practices could coincide with policies resulting from increased attention to opioids, we 1) created “combined” drug overdose deaths per 100,000 residents as an outcome, combining heroin, prescription opioids, unspecified narcotics (which could involve either prescription opioids or heroin or both), and unspecified drug related deaths. This captured all drug overdose deaths that were either reported as related to heroin or prescription opioids or that could potentially have involved heroin or prescription opioids if more drug-specific information had been included on the death certificate; 2) included totals of unspecified narcotics and unspecified drug-related deaths as a covariate when heroin and prescription opioids related deaths were outcomes in regressions; 3) included pending deaths as a covariate when heroin, prescription opioids, and combined drug overdose deaths were outcomes in regressions.

### Opioid prescribing

We identified opioid prescriptions, including hydrocodone, oxycodone, fentanyl, oxymorphone, hydromorphone, methadone, morphine, propoxyphene, tapentadol, codeine, and tramadol using the National Drug Code (NDC). We did not include cough and cold formulations containing opioids and did not include buprenorphine, an opioid partial agonist used for treatment of opioid use disorder as well as for pain. In addition, methadone dispensed through methadone maintenance treatment programs is not included in IMS data. To obtain milligrams of opioids prescribed in morphine equivalents (MME) per state resident per year, we multiplied milligrams of opioids prescribed annually by an MME conversion factor for each drug (available at See National Center for Injury Prevention and Control. CDC compilation of opioid analgesic formulations with morphine milligram equivalent conversion factors, 2015 version. Atlanta, GA: Centers for Disease Control and Prevention; 2015. [http://www.pdmpassist.org/pdf/BJA\\_performance\\_measure\\_aid\\_MME\\_conversion.pdf](http://www.pdmpassist.org/pdf/BJA_performance_measure_aid_MME_conversion.pdf). Accessed October 30, 2015). We then summed MMEs for all opioid drugs and divided total MMEs prescribed annually by number of state residents.

### Estimates for state-level per-population buprenorphine treatment capacity

We estimated state-level buprenorphine treatment capacity using Substance Abuse and Mental Health Service Administration (SAMHSA) data on physicians who were eligible to provide buprenorphine for opioid use disorder for 30 patients or for 100 patients. See “Number of DATA-Certified Physicians” at <http://www.samhsa.gov/medication-assisted-treatment/physician-program-data/certified-physicians> (accessed May 29, 2016). Capacity was estimated as number of patients that could be treated if all physicians treated the maximum number of patients they were eligible to treat.

**Estimated buprenorphine treatment capacity per 10,000 population**

|               | <b>2006</b> | <b>2007</b> | <b>2008</b> | <b>2009</b> | <b>2010</b> | <b>2011</b> | <b>2012</b> | <b>2013</b> |
|---------------|-------------|-------------|-------------|-------------|-------------|-------------|-------------|-------------|
| Kentucky      | 0.79        | 6.59        | 4.97        | 7.30        | 5.13        | 6.16        | 11.32       | 13.46       |
| Ohio          | 1.12        | 6.46        | 3.34        | 3.43        | 4.63        | 3.50        | 6.06        | 8.81        |
| Tennessee     | 1.00        | 7.56        | 4.08        | 4.68        | 6.32        | 5.08        | 5.02        | 6.65        |
| West Virginia | 0.33        | 8.49        | 7.55        | 9.95        | 7.33        | 8.69        | 8.37        | 11.82       |

*pain clinic law only states*

|           | <b>2006</b> | <b>2007</b> | <b>2008</b> | <b>2009</b> | <b>2010</b> | <b>2011</b> | <b>2012</b> | <b>2013</b> |
|-----------|-------------|-------------|-------------|-------------|-------------|-------------|-------------|-------------|
| Florida   | 1.29        | 8.63        | 4.45        | 5.44        | 4.62        | 3.58        | 4.01        | 4.74        |
| Louisiana | 1.78        | 6.70        | 2.81        | 5.31        | 4.96        | 2.55        | 4.33        | 8.15        |
| Texas     | 0.70        | 3.79        | 2.21        | 2.25        | 2.87        | 2.01        | 2.22        | 2.86        |

*comparison states*

|                      | <b>2006</b> | <b>2007</b> | <b>2008</b> | <b>2009</b> | <b>2010</b> | <b>2011</b> | <b>2012</b> | <b>2013</b> |
|----------------------|-------------|-------------|-------------|-------------|-------------|-------------|-------------|-------------|
| Alabama              | 0.79        | 7.97        | 2.60        | 3.49        | 5.55        | 4.99        | 5.28        | 5.69        |
| Arizona              | 1.60        | 6.75        | 4.18        | 2.44        | 3.31        | 2.84        | 3.13        | 2.87        |
| California           | 1.31        | 6.66        | 3.23        | 2.73        | 3.49        | 3.17        | 2.96        | 3.79        |
| Colorado             | 1.93        | 4.97        | 3.88        | 4.61        | 3.15        | 3.10        | 3.80        | 3.29        |
| Connecticut          | 1.88        | 17.79       | 6.82        | 5.70        | 8.83        | 8.11        | 6.05        | 10.96       |
| Delaware             | 1.65        | 12.90       | 4.09        | 3.37        | 8.49        | 9.90        | 9.22        | 5.23        |
| District of Columbia | 1.42        | 8.41        | 1.73        | 1.14        | 10.40       | 7.28        | 7.87        | 11.42       |
| Georgia              | 0.60        | 6.40        | 3.67        | 4.18        | 4.44        | 2.03        | 2.69        | 3.21        |
| Illinois             | 0.00        | 1.50        | 0.20        | 1.10        | 2.03        | 0.93        | 0.83        | 1.72        |
| Indiana              | 0.68        | 4.85        | 2.01        | 2.23        | 2.05        | 2.01        | 1.81        | 1.80        |
| Iowa                 | 0.72        | 5.69        | 3.08        | 2.01        | 2.69        | 2.43        | 4.36        | 3.29        |
| Kansas               | 0.54        | 3.14        | 1.22        | 2.43        | 1.82        | 1.74        | 3.43        | 2.65        |
| Maine                | 2.61        | 20.99       | 5.59        | 9.28        | 12.08       | 12.38       | 10.84       | 13.73       |
| Maryland             | 2.81        | 17.81       | 7.07        | 8.62        | 8.64        | 5.06        | 7.98        | 9.56        |
| Massachusetts        | 4.87        | 27.57       | 10.36       | 9.85        | 14.52       | 10.12       | 17.29       | 12.27       |
| Michigan             | 2.81        | 10.34       | 4.97        | 7.53        | 6.49        | 2.58        | 2.55        | 4.37        |
| Minnesota            | 0.86        | 3.81        | 1.99        | 1.77        | 2.18        | 1.19        | 2.25        | 2.12        |
| Missouri             | 0.93        | 3.69        | 1.96        | 2.53        | 3.09        | 2.79        | 2.27        | 2.54        |
| Nevada               | 0.61        | 4.96        | 2.19        | 3.06        | 3.25        | 3.10        | 3.63        | 5.44        |
| New Hampshire        | 1.13        | 8.19        | 1.40        | 3.86        | 6.57        | 4.93        | 2.48        | 5.46        |
| New Jersey           | 1.98        | 15.65       | 5.01        | 4.52        | 6.39        | 3.34        | 4.40        | 6.64        |
| New York             | 1.24        | 4.99        | 4.00        | 2.90        | 8.62        | 3.01        | 2.51        | 3.10        |
| North Carolina       | 3.45        | 12.08       | 5.63        | 6.38        | 8.81        | 6.13        | 5.69        | 7.36        |
| Oklahoma             | 1.78        | 2.76        | 1.66        | 3.80        | 1.75        | 2.55        | 2.18        | 3.50        |
| Oregon               | 2.15        | 5.04        | 3.10        | 3.81        | 4.41        | 3.97        | 4.41        | 4.79        |
| Pennsylvania         | 2.24        | 12.77       | 5.72        | 5.45        | 7.64        | 7.07        | 7.44        | 7.98        |
| Rhode Island         | 3.29        | 26.19       | 8.59        | 6.12        | 15.94       | 5.79        | 9.76        | 7.07        |
| South Carolina       | 0.49        | 5.85        | 3.96        | 3.59        | 1.87        | 1.36        | 4.00        | 5.13        |
| Utah                 | 1.83        | 17.56       | 6.54        | 6.99        | 4.39        | 5.21        | 5.73        | 6.91        |

|                                      |             |             |             |             |             |             |             |             |
|--------------------------------------|-------------|-------------|-------------|-------------|-------------|-------------|-------------|-------------|
| Vermont                              | 0.59        | 6.30        | 2.38        | 2.40        | 2.77        | 2.56        | 2.67        | 4.53        |
| Virginia                             | 6.11        | 24.86       | 10.25       | 7.87        | 7.05        | 10.81       | 8.77        | 21.50       |
| Wisconsin                            | 0.86        | 7.89        | 2.16        | 3.62        | 3.20        | 3.26        | 3.66        | 4.05        |
|                                      | <b>2006</b> | <b>2007</b> | <b>2008</b> | <b>2009</b> | <b>2010</b> | <b>2011</b> | <b>2012</b> | <b>2013</b> |
| <i>PDMP + pain clinic law states</i> | 0.81        | 7.27        | 4.98        | 6.34        | 5.85        | 5.86        | 7.69        | 10.18       |
| <i>pain clinic law only states</i>   | 1.26        | 6.37        | 3.16        | 4.33        | 4.15        | 2.72        | 3.52        | 5.25        |
| <i>comparison states</i>             | 1.74        | 10.20       | 4.10        | 4.36        | 5.81        | 4.55        | 5.06        | 6.06        |

## Statistical analysis

### *Opioid prescribing rates*

We modeled opioid prescribing rates in MMEs at the state level per year as the prescribing outcome because this measures simultaneously changes in the quantity and strength of opioids available to the population. In these models, our state-level time-varying characteristics included only opioid overdose death rates and the one year lag of opioid overdose rates (i.e., rates from the previous year). We included these because awareness of previous opioid overdose deaths may have effected clinical practice or policy.

### *Buprenorphine prescribing capacity*

We conducted a sensitivity analysis including estimates for state-level per-population buprenorphine treatment capacity, calculating total number of patients who could be treated with buprenorphine for opioid use disorder based on physician waivers obtained from the Substance Abuse and Mental Health Services Administration (SAMHSA). (Substance Abuse and Mental Health Services Administration. Number of DATA-Certified Physicians. Available at [http://www.samhsa.gov/medication-assisted-treatment/physician-program-data/certified-physicians?field\\_bup\\_us\\_state\\_code\\_value=All&=Apply](http://www.samhsa.gov/medication-assisted-treatment/physician-program-data/certified-physicians?field_bup_us_state_code_value=All&=Apply). Accessed June 4, 2016.)

### *Overdose outcomes*

The death rate outcomes have right-skewed distribution and were modeled using a generalized linear model (GLM) with gamma distribution and log link function. The models with prescribing rates as the outcome were modeled using OLS estimation, as prescribing rates in our data followed a normal distribution. Standard errors were clustered at the state level to correct for serial correlation within states over time. (see Bertrand M, Dufol E, Mullainathan S. How much should we trust differences-in-differences estimates? The Quarterly Journal of Economics. 2004; 119(1):249-275.)

## Regression specifications:

specification of regression 1: Opioid prescribing rate =  $a + b_1 \cdot \text{policy cat1} + b_2 \cdot \text{policy cat2} + b_3 \cdot \text{Rx opioid death rate} + b_4 \cdot \text{Rx opioid death rate}_{\text{one year lag}} + \text{year fixed effects} + \text{state fixed effects} + \text{state specific time trends} + \text{error term}$

specification of regression 2: Rx opioid death rate =  $a + b_1 \cdot \text{policy cat1} + b_2 \cdot \text{policy cat2} + b_3 \cdot \text{opioid prescribing rate} + b_4 \cdot \text{pending death rate} + b_5 \cdot \text{unspecified drug overdose death rate} + \text{year fixed effects} + \text{state fixed effects} + \text{state specific time trends} + \text{error term}$

specification of regression 3: Heroin death rate= $a + b1 \cdot \text{policy cat1} + b2 \cdot \text{policy cat2} + b3 \cdot \text{opioid prescribing rate} + b4 \cdot \text{pending death rate} + b5 \cdot \text{Rx opioid death rate} + b6 \cdot \text{unspecified drug overdose death rate} + \text{year fixed effects} + \text{state fixed effects} + \text{state specific time trends} + \text{error term}$

specification of regression 4: Combined drug death rate= $a + b1 \cdot \text{policy cat1} + b2 \cdot \text{policy cat2} + b3 \cdot \text{opioid prescribing rate} + b4 \cdot \text{pending death rate} + \text{year fixed effects} + \text{state fixed effects} + \text{state specific time trends} + \text{error term}$

Note: policy cat1 is mandatory review + pain clinic law; policy cat2 is pain clinic law only

**Complete regression results:**

|                                |                                    | <i>Dependent variables</i>       |         |       |                   |
|--------------------------------|------------------------------------|----------------------------------|---------|-------|-------------------|
|                                |                                    | Opioid prescribing rate<br>N=312 |         |       |                   |
| <i>Independent variables:</i>  |                                    | b (coefficient)                  | SE      | P> z  | 95% CI            |
|                                | mandatory review + pain clinic law | -80.064                          | 34.854  | 0.023 | -147.421 -11.752  |
|                                | pain clinic law only               | -54.663                          | 59.339  | 0.366 | -169.030 60.563   |
|                                | opioid prescribing rate            | N/A                              | N/A     | N/A   | N/A N/A           |
|                                | pending death rate                 | N/A                              | N/A     | N/A   | N/A N/A           |
|                                | rx_opioid_death_rate               | 8.016                            | 8.266   | 0.332 | -8.186 24.217     |
|                                | lagged_rx_opioid_death_rate        | 5.841                            | 5.635   | 0.300 | -5.205 16.886     |
|                                | unspecified drug death rate        | N/A                              | N/A     | N/A   | N/A N/A           |
| Year fixed effects (ref. 2006) | year_2007                          | 43.277                           | 27.382  | 0.114 | -10.391 96.945    |
|                                | year_2008                          | 79.659                           | 51.688  | 0.123 | -21.647 180.965   |
|                                | year_2009                          | 95.752                           | 77.462  | 0.216 | -56.071 247.575   |
|                                | year_2010                          | 130.359                          | 100.262 | 0.194 | -66.151 326.869   |
|                                | year_2011                          | 108.000                          | 123.587 | 0.382 | -134.226 350.227  |
|                                | year_2012                          | 82.302                           | 150.674 | 0.585 | -213.014 377.617  |
|                                | year_2013                          | 37.840                           | 176.892 | 0.831 | -308.862 384.541  |
| State fixed effects (ref. AL)  | state_AZ                           | -95.910                          | 30.387  | 0.002 | -155.467 -36.353  |
|                                | state_CA                           | -354.020                         | 1.204   | 0.000 | -356.379 -351.661 |
|                                | state_CO                           | -338.889                         | 19.570  | 0.000 | -377.245 -300.533 |
|                                | state_CT                           | -161.646                         | 12.448  | 0.000 | -186.044 -137.248 |
|                                | state_DC                           | -636.103                         | 7.672   | 0.000 | -651.140 -621.066 |

|          |          |         |       |          |          |
|----------|----------|---------|-------|----------|----------|
| state_DE | 185.709  | 1.446   | 0.000 | 182.875  | 188.542  |
| state_FL | 109.042  | 67.352  | 0.105 | -22.967  | 241.050  |
| state_GA | -234.302 | 1.637   | 0.000 | -237.512 | -231.093 |
| state_IA | -366.051 | 11.279  | 0.000 | -388.158 | -343.944 |
| state_IL | -445.820 | 0.484   | 0.000 | -446.768 | -444.871 |
| state_IN | -29.930  | 8.451   | 0.000 | -46.494  | -13.365  |
| state_KS | -216.259 | 3.738   | 0.000 | -223.585 | -208.934 |
| state_KY | 41.241   | 45.840  | 0.368 | -48.603  | 131.085  |
| state_LA | -0.133   | 30.835  | 0.997 | -60.569  | 60.303   |
| state_MA | -305.645 | 23.543  | 0.000 | -351.788 | -259.503 |
| state_MD | -247.556 | 19.813  | 0.000 | -286.390 | -208.723 |
| state_ME | 13.782   | 57.848  | 0.812 | -99.599  | 127.162  |
| state_MI | -154.713 | 8.277   | 0.000 | -170.935 | -138.490 |
| state_MN | -452.402 | 9.760   | 0.000 | -471.530 | -433.273 |
| state_MO | -149.302 | 31.654  | 0.000 | -211.341 | -87.262  |
| state_NC | -150.659 | 70.747  | 0.033 | -289.321 | -11.997  |
| state_NH | -207.146 | 52.516  | 0.000 | -310.076 | -104.217 |
| state_NJ | -213.944 | 22.389  | 0.000 | -257.825 | -170.062 |
| state_NV | 223.692  | 123.672 | 0.070 | -18.701  | 466.085  |
| state_NY | -347.641 | 8.152   | 0.000 | -363.619 | -331.663 |
| state_OH | -79.700  | 12.155  | 0.000 | -103.525 | -55.876  |
| state_OK | -31.964  | 115.757 | 0.782 | -258.843 | 194.915  |
| state_OR | -19.657  | 56.175  | 0.726 | -129.758 | 90.445   |
| state_PA | -155.107 | 12.995  | 0.000 | -180.577 | -129.637 |
| state_RI | -242.374 | 20.176  | 0.000 | -281.917 | -202.830 |
| state_SC | -134.252 | 16.969  | 0.000 | -167.510 | -100.993 |
| state_TN | 61.045   | 44.227  | 0.168 | -25.638  | 147.727  |
| state_TX | -342.349 | 23.809  | 0.000 | -389.014 | -295.685 |
| state_UT | -87.694  | 117.878 | 0.457 | -318.732 | 143.343  |
| state_VA | -314.766 | 12.552  | 0.000 | -339.367 | -290.165 |
| state_VT | -320.029 | 64.087  | 0.000 | -445.636 | -194.421 |
| state_WI | -288.956 | 30.649  | 0.000 | -349.026 | -228.885 |
| state_WV | 144.143  | 115.724 | 0.213 | -82.671  | 370.957  |
| _cons    | 743.258  | 71.312  | 0.000 | 603.489  | 883.026  |

state specific time trends (omitted)

Prescription opioid overdose death rate

N=312

|                                    | b (coefficient) | SE    | P> z  | 95% CI |        |
|------------------------------------|-----------------|-------|-------|--------|--------|
| mandatory review + pain clinic law | -0.206          | 0.081 | 0.011 | -0.365 | -0.047 |
| pain clinic law only               | -0.030          | 0.065 | 0.647 | -0.158 | 0.098  |
| opioid prescribing rate            | 0.001           | 0.000 | 0.000 | 0.001  | 0.002  |
| pending death rate                 | -0.025          | 0.005 | 0.000 | -0.035 | -0.015 |

|                                |                             |        |       |       |        |        |
|--------------------------------|-----------------------------|--------|-------|-------|--------|--------|
|                                | rx_opioid_death_rate        | N/A    | N/A   | N/A   | N/A    | N/A    |
|                                | lagged_rx_opioid_death_rate | N/A    | N/A   | N/A   | N/A    | N/A    |
|                                | unspecified drug death rate | 0.000  | 0.043 | 0.992 | -0.085 | 0.084  |
| Year fixed effects (ref. 2006) |                             | 0.026  | 0.039 | 0.512 | -0.051 | 0.102  |
|                                | year_2007                   |        |       |       |        |        |
|                                | year_2008                   | 0.073  | 0.048 | 0.129 | -0.021 | 0.168  |
|                                | year_2009                   | 0.135  | 0.061 | 0.028 | 0.014  | 0.255  |
|                                | year_2010                   | 0.182  | 0.068 | 0.008 | 0.048  | 0.316  |
|                                | year_2011                   | 0.276  | 0.070 | 0.000 | 0.139  | 0.413  |
|                                | year_2012                   | 0.310  | 0.074 | 0.000 | 0.166  | 0.454  |
|                                | year_2013                   | 0.449  | 0.068 | 0.000 | 0.316  | 0.583  |
| State fixed effects (ref. AL)  |                             | 0.426  | 0.089 | 0.000 | 0.253  | 0.600  |
|                                | state_AZ                    |        |       |       |        |        |
|                                | state_CA                    | 0.050  | 0.125 | 0.688 | -0.194 | 0.294  |
|                                | state_CO                    | 0.416  | 0.090 | 0.000 | 0.239  | 0.593  |
|                                | state_CT                    | -0.483 | 0.126 | 0.000 | -0.730 | -0.236 |
|                                | state_DC                    | 0.610  | 0.263 | 0.020 | 0.095  | 1.125  |
|                                | state_DE                    | -0.356 | 0.081 | 0.000 | -0.515 | -0.197 |
|                                | state_FL                    | 0.384  | 0.055 | 0.000 | 0.277  | 0.492  |
|                                | state_GA                    | 0.272  | 0.089 | 0.002 | 0.099  | 0.446  |
|                                | state_IA                    | -0.038 | 0.187 | 0.839 | -0.405 | 0.329  |
|                                | state_IL                    | 0.231  | 0.166 | 0.163 | -0.094 | 0.555  |
|                                | state_IN                    | -0.389 | 0.067 | 0.000 | -0.519 | -0.258 |
|                                | state_KS                    | 0.060  | 0.094 | 0.521 | -0.124 | 0.244  |
|                                | state_KY                    | 0.359  | 0.101 | 0.000 | 0.161  | 0.557  |
|                                | state_LA                    | -0.166 | 0.184 | 0.366 | -0.526 | 0.194  |
|                                | state_MA                    | 0.385  | 0.196 | 0.049 | 0.001  | 0.768  |
|                                | state_MD                    | 0.304  | 0.222 | 0.171 | -0.131 | 0.739  |
|                                | state_ME                    | 0.304  | 0.108 | 0.005 | 0.093  | 0.516  |
|                                | state_MI                    | -0.038 | 0.071 | 0.591 | -0.177 | 0.101  |
|                                | state_MN                    | 0.459  | 0.203 | 0.024 | 0.061  | 0.857  |
|                                | state_MO                    | 0.346  | 0.103 | 0.001 | 0.144  | 0.549  |
|                                | state_NC                    | 0.717  | 0.225 | 0.001 | 0.275  | 1.158  |
|                                | state_NH                    | 0.612  | 0.194 | 0.002 | 0.232  | 0.992  |
|                                | state_NJ                    | -0.564 | 0.121 | 0.000 | -0.801 | -0.327 |
|                                | state_NV                    | 0.656  | 0.211 | 0.002 | 0.242  | 1.070  |
|                                | state_NY                    | 0.040  | 0.202 | 0.841 | -0.356 | 0.437  |
|                                | state_OH                    | 0.033  | 0.052 | 0.527 | -0.069 | 0.134  |
|                                | state_OK                    | 0.989  | 0.133 | 0.000 | 0.729  | 1.249  |
|                                | state_OR                    | 0.638  | 0.177 | 0.000 | 0.292  | 0.984  |
|                                | state_PA                    | -0.277 | 0.119 | 0.020 | -0.510 | -0.045 |
|                                | state_RI                    | 0.315  | 0.170 | 0.065 | -0.019 | 0.648  |
|                                | state_SC                    | 0.158  | 0.048 | 0.001 | 0.063  | 0.253  |
|                                | state_TN                    | 0.249  | 0.060 | 0.000 | 0.132  | 0.366  |

|          |       |       |       |        |       |
|----------|-------|-------|-------|--------|-------|
| state_TX | 0.197 | 0.143 | 0.168 | -0.083 | 0.478 |
| state_UT | 1.094 | 0.137 | 0.000 | 0.826  | 1.363 |
| state_VA | 0.260 | 0.194 | 0.181 | -0.121 | 0.641 |
| state_VT | 0.807 | 0.186 | 0.000 | 0.443  | 1.171 |
| state_WI | 0.428 | 0.157 | 0.006 | 0.121  | 0.736 |
| state_WV | 1.128 | 0.226 | 0.000 | 0.685  | 1.572 |
| _cons    | 0.745 | 0.277 | 0.007 | 0.202  | 1.287 |

state specific time trends (omitted)

|                                |                                    | Heroin overdose death rate |       |       |        |        |
|--------------------------------|------------------------------------|----------------------------|-------|-------|--------|--------|
|                                |                                    | N=312                      |       |       |        |        |
|                                |                                    | b (coefficient)            | SE    | P> z  | 95% CI |        |
|                                | mandatory review + pain clinic law | -0.148                     | 0.222 | 0.506 | -0.584 | 0.288  |
|                                | pain clinic law only               | -0.246                     | 0.338 | 0.467 | -0.907 | 0.416  |
|                                | opioid prescribing rate            | -0.001                     | 0.001 | 0.168 | -0.002 | 0.000  |
|                                | pending death rate                 | -0.018                     | 0.011 | 0.112 | -0.040 | 0.004  |
|                                | rx_opioid_death_rate               | 0.040                      | 0.040 | 0.319 | -0.038 | 0.118  |
|                                | lagged_rx_opioid_death_rate        | N/A                        | N/A   | N/A   | N/A    | N/A    |
|                                | unspecified drug death rate        | -0.002                     | 0.058 | 0.979 | -0.114 | 0.111  |
| Year fixed effects (ref. 2006) | year_2007                          | 0.215                      | 0.120 | 0.073 | -0.020 | 0.451  |
|                                | year_2008                          | 0.719                      | 0.163 | 0.000 | 0.401  | 1.038  |
|                                | year_2009                          | 0.922                      | 0.209 | 0.000 | 0.512  | 1.332  |
|                                | year_2010                          | 0.839                      | 0.258 | 0.001 | 0.335  | 1.344  |
|                                | year_2011                          | 1.317                      | 0.255 | 0.000 | 0.818  | 1.815  |
|                                | year_2012                          | 1.763                      | 0.272 | 0.000 | 1.230  | 2.296  |
|                                | year_2013                          | 2.173                      | 0.283 | 0.000 | 1.619  | 2.728  |
| State fixed effects (ref. AL)  | state_AZ                           | 2.478                      | 0.125 | 0.000 | 2.234  | 2.722  |
|                                | state_CA                           | 2.219                      | 0.232 | 0.000 | 1.765  | 2.674  |
|                                | state_CO                           | 2.118                      | 0.217 | 0.000 | 1.692  | 2.544  |
|                                | state_CT                           | 3.596                      | 0.202 | 0.000 | 3.200  | 3.991  |
|                                | state_DC                           | 1.625                      | 0.394 | 0.000 | 0.852  | 2.398  |
|                                | state_DE                           | 2.618                      | 0.165 | 0.000 | 2.296  | 2.941  |
|                                | state_FL                           | 1.892                      | 0.178 | 0.000 | 1.543  | 2.240  |
|                                | state_GA                           | 0.137                      | 0.163 | 0.399 | -0.182 | 0.456  |
|                                | state_IA                           | 0.051                      | 0.281 | 0.855 | -0.499 | 0.602  |
|                                | state_IL                           | 1.313                      | 0.289 | 0.000 | 0.747  | 1.879  |
|                                | state_IN                           | 1.123                      | 0.143 | 0.000 | 0.843  | 1.403  |
|                                | state_KS                           | 0.033                      | 0.152 | 0.827 | -0.265 | 0.331  |
|                                | state_KY                           | -0.610                     | 0.176 | 0.001 | -0.956 | -0.264 |
|                                | state_LA                           | 0.718                      | 0.257 | 0.005 | 0.213  | 1.222  |

|          |        |       |       |        |        |
|----------|--------|-------|-------|--------|--------|
| state_MA | 1.669  | 0.288 | 0.000 | 1.106  | 2.233  |
| state_MD | 3.148  | 0.306 | 0.000 | 2.549  | 3.747  |
| state_ME | 1.176  | 0.174 | 0.000 | 0.834  | 1.517  |
| state_MI | 2.825  | 0.146 | 0.000 | 2.539  | 3.110  |
| state_MN | -0.379 | 0.295 | 0.199 | -0.958 | 0.199  |
| state_MO | 2.622  | 0.163 | 0.000 | 2.302  | 2.942  |
| state_NC | 1.733  | 0.342 | 0.000 | 1.062  | 2.403  |
| state_NH | 1.305  | 0.296 | 0.000 | 0.726  | 1.884  |
| state_NJ | 2.456  | 0.160 | 0.000 | 2.141  | 2.770  |
| state_NV | 3.041  | 0.406 | 0.000 | 2.245  | 3.837  |
| state_NY | 1.932  | 0.289 | 0.000 | 1.367  | 2.498  |
| state_OH | 2.588  | 0.144 | 0.000 | 2.306  | 2.871  |
| state_OK | 0.476  | 0.338 | 0.160 | -0.188 | 1.139  |
| state_OR | 3.627  | 0.251 | 0.000 | 3.134  | 4.120  |
| state_PA | 2.270  | 0.215 | 0.000 | 1.850  | 2.691  |
| state_RI | 1.101  | 0.294 | 0.000 | 0.524  | 1.677  |
| state_SC | 0.288  | 0.140 | 0.039 | 0.015  | 0.561  |
| state_TN | 0.159  | 0.147 | 0.278 | -0.128 | 0.446  |
| state_TX | 2.389  | 0.266 | 0.000 | 1.866  | 2.911  |
| state_UT | 3.221  | 0.334 | 0.000 | 2.566  | 3.876  |
| state_VA | 2.364  | 0.281 | 0.000 | 1.815  | 2.914  |
| state_VT | 0.752  | 0.327 | 0.021 | 0.111  | 1.393  |
| state_WI | 1.572  | 0.251 | 0.000 | 1.080  | 2.063  |
| state_WV | 2.146  | 0.518 | 0.000 | 1.130  | 3.162  |
| _cons    | -1.935 | 0.488 | 0.000 | -2.891 | -0.980 |

state specific time trends (omitted)

Combined drug overdose death rate

N=312

|                                    | b (coefficient) | SE    | P> z  | 95% CI |        |
|------------------------------------|-----------------|-------|-------|--------|--------|
| mandatory review + pain clinic law | -0.094          | 0.037 | 0.012 | -0.167 | -0.021 |
| pain clinic law only               | -0.036          | 0.032 | 0.273 | -0.099 | 0.028  |
| opioid prescribing rate            | 0.001           | 0.000 | 0.000 | 0.000  | 0.001  |
| pending death rate                 | -0.024          | 0.004 | 0.000 | -0.033 | -0.016 |
| rx_opioid_death_rate               | N/A             | N/A   | N/A   | N/A    | N/A    |
| lagged_rx_opioid_death_rate        | N/A             | N/A   | N/A   | N/A    | N/A    |
| unspecified drug death rate        | N/A             | N/A   | N/A   | N/A    | N/A    |
| Year fixed effects (ref. 2006)     | 0.058           | 0.022 | 0.010 | 0.014  | 0.101  |
| year_2007                          |                 |       |       |        |        |
| year_2008                          | 0.141           | 0.028 | 0.000 | 0.087  | 0.196  |
| year_2009                          | 0.189           | 0.043 | 0.000 | 0.105  | 0.272  |
| year_2010                          | 0.213           | 0.044 | 0.000 | 0.126  | 0.300  |



|                   |                                      |        |       |       |        |        |
|-------------------|--------------------------------------|--------|-------|-------|--------|--------|
|                   | year_2011                            | 0.375  | 0.039 | 0.000 | 0.298  | 0.452  |
|                   | year_2012                            | 0.437  | 0.037 | 0.000 | 0.365  | 0.509  |
|                   | year_2013                            | 0.617  | 0.036 | 0.000 | 0.547  | 0.686  |
|                   |                                      | 0.276  | 0.013 | 0.000 | 0.249  | 0.302  |
| State fixed       | state_AZ                             |        |       |       |        |        |
| effects (ref. AL) | state_CA                             | -0.082 | 0.060 | 0.169 | -0.199 | 0.035  |
|                   | state_CO                             | 0.277  | 0.055 | 0.000 | 0.170  | 0.385  |
|                   | state_CT                             | -0.183 | 0.044 | 0.000 | -0.269 | -0.098 |
|                   | state_DC                             | 0.367  | 0.103 | 0.000 | 0.165  | 0.569  |
|                   | state_DE                             | -0.326 | 0.038 | 0.000 | -0.399 | -0.252 |
|                   | state_FL                             | 0.185  | 0.035 | 0.000 | 0.117  | 0.254  |
|                   | state_GA                             | 0.060  | 0.037 | 0.101 | -0.012 | 0.133  |
|                   | state_IA                             | -0.576 | 0.060 | 0.000 | -0.694 | -0.459 |
|                   | state_IL                             | 0.020  | 0.067 | 0.761 | -0.111 | 0.152  |
|                   | state_IN                             | -0.044 | 0.036 | 0.222 | -0.115 | 0.027  |
|                   | state_KS                             | -0.153 | 0.035 | 0.000 | -0.222 | -0.085 |
|                   | state_KY                             | 0.192  | 0.039 | 0.000 | 0.116  | 0.268  |
|                   | state_LA                             | 0.235  | 0.033 | 0.000 | 0.170  | 0.301  |
|                   | state_MA                             | 0.086  | 0.055 | 0.121 | -0.022 | 0.194  |
|                   | state_MD                             | 0.026  | 0.050 | 0.594 | -0.071 | 0.124  |
|                   | state_ME                             | -0.097 | 0.040 | 0.015 | -0.175 | -0.019 |
|                   | state_MI                             | -0.050 | 0.047 | 0.279 | -0.141 | 0.041  |
|                   | state_MN                             | -0.089 | 0.076 | 0.240 | -0.237 | 0.059  |
|                   | state_MO                             | 0.021  | 0.035 | 0.559 | -0.049 | 0.090  |
|                   | state_NC                             | -0.127 | 0.035 | 0.000 | -0.196 | -0.059 |
|                   | state_NH                             | -0.063 | 0.042 | 0.137 | -0.145 | 0.020  |
|                   | state_NJ                             | -0.346 | 0.029 | 0.000 | -0.403 | -0.288 |
|                   | state_NV                             | 0.225  | 0.054 | 0.000 | 0.119  | 0.330  |
|                   | state_NY                             | -0.399 | 0.058 | 0.000 | -0.512 | -0.286 |
|                   | state_OH                             | 0.092  | 0.025 | 0.000 | 0.042  | 0.141  |
|                   | state_OK                             | 0.348  | 0.017 | 0.000 | 0.313  | 0.382  |
|                   | state_OR                             | 0.234  | 0.007 | 0.000 | 0.221  | 0.247  |
|                   | state_PA                             | 0.319  | 0.023 | 0.000 | 0.275  | 0.364  |
|                   | state_RI                             | 0.144  | 0.047 | 0.002 | 0.052  | 0.236  |
|                   | state_SC                             | 0.047  | 0.038 | 0.222 | -0.028 | 0.122  |
|                   | state_TN                             | 0.008  | 0.036 | 0.820 | -0.062 | 0.078  |
|                   | state_TX                             | -0.116 | 0.049 | 0.017 | -0.212 | -0.020 |
|                   | state_UT                             | 0.574  | 0.006 | 0.000 | 0.562  | 0.586  |
|                   | state_VA                             | -0.282 | 0.054 | 0.000 | -0.387 | -0.177 |
|                   | state_VT                             | -0.012 | 0.051 | 0.818 | -0.112 | 0.089  |
|                   | state_WI                             | -0.197 | 0.053 | 0.000 | -0.301 | -0.092 |
|                   | state_WV                             | 0.430  | 0.043 | 0.000 | 0.345  | 0.515  |
|                   | _cons                                | 1.972  | 0.114 | 0.000 | 1.749  | 2.194  |
|                   | state specific time trends (omitted) |        |       |       |        |        |

Sensitivity analysis including state-level per-population buprenorphine treatment capacity:

specification of regression 5: Opioid prescribing rate= $a + b1*\text{policy cat1} + b2*\text{policy cat2} + b3*\text{Rx opioid death rate} + b4*\text{Rx opioid death rate\_one year lag} + b5*\text{treatment capacity rate} + \text{year fixed effects} + \text{state fixed effects} + \text{state specific time trends} + \text{error term}$

specification of regression 6: Rx opioid death rate= $a + b1*\text{policy cat1} + b2*\text{policy cat2} + b3*\text{opioid prescribing rate} + b4*\text{pending death rate} + b5*\text{unspecified drug overdose death rate} + b6*\text{treatment capacity rate} + \text{year fixed effects} + \text{state fixed effects} + \text{state specific time trends} + \text{error term}$

specification of regression 7: Heroin death rate= $a + b1*\text{policy cat1} + b2*\text{policy cat2} + b3*\text{opioid prescribing rate} + b4*\text{pending death rate} + b5*\text{Rx opioid death rate} + b6*\text{unspecified drug overdose death rate} + b7*\text{treatment capacity rate} + \text{year fixed effects} + \text{state fixed effects} + \text{state specific time trends} + \text{error term}$

specification of regression 8: Combined drug death rate= $a + b1*\text{policy cat1} + b2*\text{policy cat2} + b3*\text{opioid prescribing rate} + b4*\text{pending death rate} + b5*\text{treatment capacity rate} + \text{year fixed effects} + \text{state fixed effects} + \text{state specific time trends} + \text{error term}$

Note: policy cat1 is mandatory review + pain clinic law; policy cat2 is pain clinic law only; treatment capacity rate is defined as the maximum number of patients who could be treated by DATA-waivered physicians per 10,000 state residents

**Regression results for sensitivity analysis:**

|                               |                                    | <i>Dependent variables</i>       |        |       |                 |
|-------------------------------|------------------------------------|----------------------------------|--------|-------|-----------------|
|                               |                                    | Opioid prescribing rate<br>N=312 |        |       |                 |
|                               |                                    | b (coefficient)                  | SE     | P> z  | 95% CI          |
| <b>Independent variables:</b> |                                    |                                  |        |       |                 |
|                               | mandatory review + pain clinic law | -79.387                          | 34.778 | 0.028 | -149.792 -8.981 |
|                               | pain clinic law only               | -53.280                          | 59.490 | 0.376 | -173.710 67.150 |
|                               | opioid prescribing rate            | N/A                              | N/A    | N/A   | N/A N/A         |
|                               | pending death rate                 | N/A                              | N/A    | N/A   | N/A N/A         |
|                               | rx_opioid_death_rate               | 8.048                            | 8.239  | 0.335 | -8.630 24.726   |
|                               | lagged_rx_opioid_death_rate        | 5.809                            | 5.665  | 0.312 | -5.660 17.278   |
|                               | unspecified drug death rate        | N/A                              | N/A    | N/A   | N/A N/A         |
|                               | treatment capacity rate            | 0.394                            | 0.615  | 0.526 | -0.852 1.639    |

|                                |          |         |       |          |          |
|--------------------------------|----------|---------|-------|----------|----------|
| Year fixed effects (ref. 2006) | 39.886   | 23.341  | 0.096 | -7.366   | 87.138   |
| year_2007                      |          |         |       |          |          |
| year_2008                      | 78.178   | 46.729  | 0.103 | -16.419  | 172.775  |
| year_2009                      | 93.835   | 70.255  | 0.190 | -48.389  | 236.059  |
| year_2010                      | 127.718  | 90.880  | 0.168 | -56.260  | 311.695  |
| year_2011                      | 105.551  | 112.635 | 0.355 | -122.466 | 333.568  |
| year_2012                      | 79.354   | 137.515 | 0.567 | -199.030 | 357.738  |
| year_2013                      | 34.180   | 161.372 | 0.833 | -292.500 | 360.859  |
| State fixed effects (ref. AL)  | -96.337  | 30.093  | 0.001 | -155.318 | -37.356  |
| state_AZ                       |          |         |       |          |          |
| state_CA                       | -354.197 | 1.382   | 0.000 | -356.907 | -351.488 |
| state_CO                       | -339.137 | 19.404  | 0.000 | -377.168 | -301.105 |
| state_CT                       | -163.444 | 14.165  | 0.000 | -191.208 | -135.681 |
| state_DC                       | -636.979 | 8.500   | 0.000 | -653.639 | -620.319 |
| state_DE                       | 186.364  | 1.537   | 0.000 | 183.351  | 189.377  |
| state_FL                       | 108.494  | 67.106  | 0.106 | -23.032  | 240.020  |
| state_GA                       | -234.575 | 1.528   | 0.000 | -237.571 | -231.580 |
| state_IA                       | -365.047 | 10.610  | 0.000 | -385.843 | -344.251 |
| state_IL                       | -445.666 | 0.505   | 0.000 | -446.656 | -444.676 |
| state_IN                       | -29.748  | 8.319   | 0.000 | -46.052  | -13.443  |
| state_KS                       | -215.540 | 4.336   | 0.000 | -224.038 | -207.041 |
| state_KY                       | 41.950   | 46.519  | 0.367 | -49.225  | 133.124  |
| state_LA                       | -0.259   | 30.910  | 0.993 | -60.843  | 60.324   |
| state_MA                       | -307.719 | 22.210  | 0.000 | -351.250 | -264.189 |
| state_MD                       | -249.873 | 18.414  | 0.000 | -285.965 | -213.782 |
| state_ME                       | 9.810    | 55.235  | 0.859 | -98.449  | 118.069  |
| state_MI                       | -156.342 | 7.534   | 0.000 | -171.108 | -141.577 |
| state_MN                       | -452.043 | 9.492   | 0.000 | -470.647 | -433.439 |
| state_MO                       | -148.947 | 31.956  | 0.000 | -211.581 | -86.314  |
| state_NC                       | -150.153 | 71.195  | 0.035 | -289.692 | -10.614  |
| state_NH                       | -207.337 | 52.412  | 0.000 | -310.064 | -104.611 |
| state_NJ                       | -215.667 | 23.901  | 0.000 | -262.513 | -168.821 |
| state_NV                       | 223.402  | 123.537 | 0.071 | -18.726  | 465.531  |
| state_NY                       | -349.230 | 9.682   | 0.000 | -368.207 | -330.253 |
| state_OH                       | -79.372  | 12.418  | 0.000 | -103.711 | -55.032  |
| state_OK                       | -31.620  | 116.102 | 0.785 | -259.176 | 195.936  |
| state_OR                       | -19.657  | 56.220  | 0.727 | -129.847 | 90.533   |
| state_PA                       | -156.274 | 14.036  | 0.000 | -183.784 | -128.763 |
| state_RI                       | -246.404 | 18.239  | 0.000 | -282.152 | -210.655 |
| state_SC                       | -134.090 | 17.109  | 0.000 | -167.622 | -100.557 |
| state_TN                       | 60.878   | 44.174  | 0.168 | -25.701  | 147.456  |
| state_TX                       | -341.806 | 23.898  | 0.000 | -388.645 | -294.967 |
| state_UT                       | -89.844  | 116.383 | 0.440 | -317.949 | 138.262  |

|          |          |         |       |          |          |
|----------|----------|---------|-------|----------|----------|
| state_VA | -314.561 | 12.724  | 0.000 | -339.499 | -289.623 |
| state_VT | -323.058 | 61.983  | 0.000 | -444.542 | -201.575 |
| state_WI | -289.102 | 30.568  | 0.000 | -349.014 | -229.190 |
| state_WV | 143.695  | 115.436 | 0.213 | -82.556  | 369.947  |
| _cons    | 742.929  | 71.153  | 0.000 | 603.472  | 882.386  |

state specific time trends (omitted)

Prescription opioid overdose death rate

N=312

|                                    | b (coefficient) | SE    | P> z  | 95% CI |        |
|------------------------------------|-----------------|-------|-------|--------|--------|
| mandatory review + pain clinic law | -0.206          | 0.082 | 0.011 | -0.366 | -0.046 |
| pain clinic law only               | -0.030          | 0.066 | 0.649 | -0.159 | 0.099  |
| opioid prescribing rate            | 0.001           | 0.000 | 0.000 | 0.001  | 0.002  |
| pending death rate                 | -0.025          | 0.005 | 0.000 | -0.035 | -0.015 |
| rx_opioid_death_rate               | N/A             | N/A   | N/A   | N/A    | N/A    |
| lagged_rx_opioid_death_rate        | N/A             | N/A   | N/A   | N/A    | N/A    |
| unspecified drug death rate        | 0.000           | 0.043 | 0.992 | -0.085 | 0.084  |
| treatment capacity rate            | 0.000           | 0.004 | 0.985 | -0.009 | 0.009  |
| Year fixed effects (ref. 2006)     | 0.026           | 0.054 | 0.627 | -0.080 | 0.133  |
| year_2007                          |                 |       |       |        |        |
| year_2008                          | 0.074           | 0.054 | 0.175 | -0.033 | 0.180  |
| year_2009                          | 0.135           | 0.070 | 0.053 | -0.002 | 0.272  |
| year_2010                          | 0.182           | 0.077 | 0.019 | 0.030  | 0.334  |
| year_2011                          | 0.276           | 0.081 | 0.001 | 0.118  | 0.435  |
| year_2012                          | 0.311           | 0.084 | 0.000 | 0.146  | 0.475  |
| year_2013                          | 0.450           | 0.080 | 0.000 | 0.293  | 0.607  |
| State fixed effects (ref. AL)      | 0.426           | 0.088 | 0.000 | 0.254  | 0.599  |
| state_AZ                           |                 |       |       |        |        |
| state_CA                           | 0.050           | 0.124 | 0.687 | -0.194 | 0.294  |
| state_CO                           | 0.416           | 0.090 | 0.000 | 0.240  | 0.593  |
| state_CT                           | -0.483          | 0.124 | 0.000 | -0.725 | -0.240 |
| state_DC                           | 0.610           | 0.261 | 0.019 | 0.099  | 1.121  |
| state_DE                           | -0.356          | 0.082 | 0.000 | -0.516 | -0.196 |
| state_FL                           | 0.385           | 0.056 | 0.000 | 0.275  | 0.494  |
| state_GA                           | 0.272           | 0.088 | 0.002 | 0.101  | 0.444  |
| state_IA                           | -0.038          | 0.191 | 0.841 | -0.412 | 0.336  |
| state_IL                           | 0.231           | 0.166 | 0.164 | -0.094 | 0.556  |
| state_IN                           | -0.389          | 0.066 | 0.000 | -0.519 | -0.259 |
| state_KS                           | 0.060           | 0.096 | 0.531 | -0.128 | 0.248  |
| state_KY                           | 0.359           | 0.100 | 0.000 | 0.163  | 0.555  |
| state_LA                           | -0.166          | 0.184 | 0.368 | -0.527 | 0.195  |

|          |        |       |       |        |        |
|----------|--------|-------|-------|--------|--------|
| state_MA | 0.385  | 0.192 | 0.045 | 0.008  | 0.762  |
| state_MD | 0.305  | 0.219 | 0.164 | -0.124 | 0.733  |
| state_ME | 0.305  | 0.112 | 0.006 | 0.086  | 0.524  |
| state_MI | -0.038 | 0.070 | 0.588 | -0.174 | 0.099  |
| state_MN | 0.459  | 0.204 | 0.025 | 0.058  | 0.859  |
| state_MO | 0.346  | 0.104 | 0.001 | 0.142  | 0.551  |
| state_NC | 0.716  | 0.227 | 0.002 | 0.271  | 1.161  |
| state_NH | 0.612  | 0.194 | 0.002 | 0.231  | 0.992  |
| state_NJ | -0.564 | 0.118 | 0.000 | -0.795 | -0.332 |
| state_NV | 0.656  | 0.211 | 0.002 | 0.242  | 1.070  |
| state_NY | 0.041  | 0.199 | 0.838 | -0.350 | 0.431  |
| state_OH | 0.033  | 0.051 | 0.526 | -0.068 | 0.134  |
| state_OK | 0.989  | 0.134 | 0.000 | 0.727  | 1.251  |
| state_OR | 0.638  | 0.177 | 0.000 | 0.291  | 0.985  |
| state_PA | -0.277 | 0.121 | 0.022 | -0.514 | -0.040 |
| state_RI | 0.315  | 0.167 | 0.058 | -0.011 | 0.642  |
| state_SC | 0.158  | 0.049 | 0.001 | 0.062  | 0.253  |
| state_TN | 0.249  | 0.060 | 0.000 | 0.132  | 0.366  |
| state_TX | 0.197  | 0.145 | 0.174 | -0.087 | 0.482  |
| state_UT | 1.095  | 0.135 | 0.000 | 0.829  | 1.360  |
| state_VA | 0.260  | 0.195 | 0.183 | -0.123 | 0.643  |
| state_VT | 0.808  | 0.182 | 0.000 | 0.451  | 1.164  |
| state_WI | 0.428  | 0.157 | 0.006 | 0.121  | 0.736  |
| state_WV | 1.128  | 0.226 | 0.000 | 0.685  | 1.572  |
| _cons    | 0.745  | 0.278 | 0.007 | 0.200  | 1.290  |

state specific time trends (omitted)

|                                |                                    | Heroin overdose death rate |       |       |        |       |
|--------------------------------|------------------------------------|----------------------------|-------|-------|--------|-------|
|                                |                                    | N=312                      |       |       |        |       |
|                                |                                    | b (coefficient)            | SE    | P> z  | 95% CI |       |
|                                | mandatory review + pain clinic law | -0.158                     | 0.226 | 0.484 | -0.602 | 0.285 |
|                                | pain clinic law only               | -0.231                     | 0.327 | 0.480 | -0.873 | 0.410 |
|                                | opioid prescribing rate            | -0.001                     | 0.001 | 0.153 | -0.002 | 0.000 |
|                                | pending death rate                 | -0.017                     | 0.010 | 0.099 | -0.038 | 0.003 |
|                                | rx_opioid_death_rate               | 0.041                      | 0.038 | 0.280 | -0.034 | 0.117 |
|                                | lagged_rx_opioid_death_rate        | N/A                        | N/A   | N/A   | N/A    | N/A   |
|                                | unspecified drug death rate        | 0.001                      | 0.059 | 0.990 | -0.115 | 0.117 |
|                                | treatment capacity rate            | 0.014                      | 0.019 | 0.483 | -0.025 | 0.052 |
| Year fixed effects (ref. 2006) | year_2007                          | 0.094                      | 0.135 | 0.488 | -0.171 | 0.359 |
|                                | year_2008                          | 0.662                      | 0.129 | 0.000 | 0.409  | 0.915 |
|                                | year_2009                          | 0.846                      | 0.166 | 0.000 | 0.521  | 1.171 |

|                   |           |        |       |       |        |        |
|-------------------|-----------|--------|-------|-------|--------|--------|
|                   | year_2010 | 0.743  | 0.206 | 0.000 | 0.340  | 1.146  |
|                   | year_2011 | 1.221  | 0.202 | 0.000 | 0.825  | 1.616  |
|                   | year_2012 | 1.649  | 0.209 | 0.000 | 1.238  | 2.060  |
|                   | year_2013 | 2.032  | 0.227 | 0.000 | 1.588  | 2.476  |
|                   |           | 2.463  | 0.117 | 0.000 | 2.234  | 2.693  |
| State fixed       |           |        |       |       |        |        |
| effects (ref. AL) | state_AZ  |        |       |       |        |        |
|                   | state_CA  | 2.213  | 0.226 | 0.000 | 1.770  | 2.656  |
|                   | state_CO  | 2.103  | 0.215 | 0.000 | 1.683  | 2.524  |
|                   | state_CT  | 3.533  | 0.218 | 0.000 | 3.106  | 3.961  |
|                   | state_DC  | 1.586  | 0.387 | 0.000 | 0.827  | 2.345  |
|                   | state_DE  | 2.644  | 0.173 | 0.000 | 2.306  | 2.982  |
|                   | state_FL  | 1.874  | 0.171 | 0.000 | 1.539  | 2.208  |
|                   | state_GA  | 0.119  | 0.160 | 0.456 | -0.194 | 0.433  |
|                   | state_IA  | 0.085  | 0.277 | 0.758 | -0.458 | 0.628  |
|                   | state_IL  | 1.315  | 0.280 | 0.000 | 0.767  | 1.862  |
|                   | state_IN  | 1.132  | 0.134 | 0.000 | 0.870  | 1.394  |
|                   | state_KS  | 0.063  | 0.144 | 0.660 | -0.219 | 0.346  |
|                   | state_KY  | -0.594 | 0.175 | 0.001 | -0.937 | -0.252 |
|                   | state_LA  | 0.702  | 0.268 | 0.009 | 0.177  | 1.227  |
|                   | state_MA  | 1.584  | 0.285 | 0.000 | 1.024  | 2.143  |
|                   | state_MD  | 3.070  | 0.294 | 0.000 | 2.493  | 3.646  |
|                   | state_ME  | 1.034  | 0.197 | 0.000 | 0.649  | 1.420  |
|                   | state_MI  | 2.768  | 0.174 | 0.000 | 2.427  | 3.109  |
|                   | state_MN  | -0.356 | 0.293 | 0.224 | -0.930 | 0.218  |
|                   | state_MO  | 2.637  | 0.165 | 0.000 | 2.314  | 2.960  |
|                   | state_NC  | 1.752  | 0.354 | 0.000 | 1.057  | 2.447  |
|                   | state_NH  | 1.304  | 0.291 | 0.000 | 0.732  | 1.875  |
|                   | state_NJ  | 2.396  | 0.177 | 0.000 | 2.049  | 2.744  |
|                   | state_NV  | 3.046  | 0.414 | 0.000 | 2.235  | 3.858  |
|                   | state_NY  | 1.881  | 0.287 | 0.000 | 1.318  | 2.444  |
|                   | state_OH  | 2.598  | 0.139 | 0.000 | 2.325  | 2.872  |
|                   | state_OK  | 0.469  | 0.335 | 0.162 | -0.189 | 1.126  |
|                   | state_OR  | 3.645  | 0.266 | 0.000 | 3.123  | 4.166  |
|                   | state_PA  | 2.224  | 0.257 | 0.000 | 1.719  | 2.729  |
|                   | state_RI  | 1.037  | 0.276 | 0.000 | 0.495  | 1.578  |
|                   | state_SC  | 0.296  | 0.130 | 0.023 | 0.041  | 0.552  |
|                   | state_TN  | 0.157  | 0.144 | 0.277 | -0.126 | 0.439  |
|                   | state_TX  | 2.409  | 0.260 | 0.000 | 1.899  | 2.919  |
|                   | state_UT  | 3.140  | 0.294 | 0.000 | 2.563  | 3.716  |
|                   | state_VA  | 2.377  | 0.276 | 0.000 | 1.835  | 2.919  |
|                   | state_VT  | 0.652  | 0.312 | 0.037 | 0.040  | 1.264  |
|                   | state_WI  | 1.568  | 0.244 | 0.000 | 1.090  | 2.045  |
|                   | state_WV  | 2.130  | 0.510 | 0.000 | 1.131  | 3.129  |
|                   | _cons     | -1.945 | 0.472 | 0.000 | -2.870 | -1.020 |

state specific time trends (omitted)

|                                |                                    | Combined drug overdose death rate |       |       |        |        |
|--------------------------------|------------------------------------|-----------------------------------|-------|-------|--------|--------|
|                                |                                    | N=312                             |       |       |        |        |
|                                |                                    | b (coefficient)                   | SE    | P> z  | 95% CI |        |
|                                | mandatory review + pain clinic law | -0.095                            | 0.036 | 0.009 | -0.166 | -0.024 |
|                                | pain clinic law only               | -0.034                            | 0.032 | 0.286 | -0.097 | 0.029  |
|                                | opioid prescribing rate            | 0.001                             | 0.000 | 0.000 | 0.000  | 0.001  |
|                                | pending death rate                 | -0.024                            | 0.004 | 0.000 | -0.033 | -0.016 |
|                                | rx_opioid_death_rate               | N/A                               | N/A   | N/A   | N/A    | N/A    |
|                                | lagged_rx_opioid_death_rate        | N/A                               | N/A   | N/A   | N/A    | N/A    |
|                                | unspecified drug death rate        | N/A                               | N/A   | N/A   | N/A    | N/A    |
|                                | treatment capacity rate            | 0.001                             | 0.004 | 0.706 | -0.006 | 0.008  |
| Year fixed effects (ref. 2006) |                                    | 0.046                             | 0.037 | 0.210 | -0.026 | 0.118  |
|                                | year_2007                          |                                   |       |       |        |        |
|                                | year_2008                          | 0.136                             | 0.034 | 0.000 | 0.069  | 0.203  |
|                                | year_2009                          | 0.182                             | 0.049 | 0.000 | 0.086  | 0.277  |
|                                | year_2010                          | 0.204                             | 0.053 | 0.000 | 0.100  | 0.307  |
|                                | year_2011                          | 0.366                             | 0.049 | 0.000 | 0.270  | 0.463  |
|                                | year_2012                          | 0.427                             | 0.049 | 0.000 | 0.331  | 0.522  |
|                                | year_2013                          | 0.603                             | 0.054 | 0.000 | 0.497  | 0.710  |
| State fixed effects (ref. AL)  |                                    | 0.274                             | 0.013 | 0.000 | 0.248  | 0.300  |
|                                | state_AZ                           |                                   |       |       |        |        |
|                                | state_CA                           | -0.083                            | 0.059 | 0.163 | -0.200 | 0.034  |
|                                | state_CO                           | 0.277                             | 0.055 | 0.000 | 0.170  | 0.383  |
|                                | state_CT                           | -0.190                            | 0.043 | 0.000 | -0.274 | -0.105 |
|                                | state_DC                           | 0.363                             | 0.104 | 0.000 | 0.160  | 0.567  |
|                                | state_DE                           | -0.323                            | 0.039 | 0.000 | -0.399 | -0.247 |
|                                | state_FL                           | 0.184                             | 0.035 | 0.000 | 0.115  | 0.252  |
|                                | state_GA                           | 0.059                             | 0.037 | 0.111 | -0.014 | 0.131  |
|                                | state_IA                           | -0.573                            | 0.062 | 0.000 | -0.696 | -0.451 |
|                                | state_IL                           | 0.020                             | 0.067 | 0.762 | -0.111 | 0.152  |
|                                | state_IN                           | -0.043                            | 0.036 | 0.233 | -0.115 | 0.028  |
|                                | state_KS                           | -0.151                            | 0.037 | 0.000 | -0.223 | -0.080 |
|                                | state_KY                           | 0.195                             | 0.040 | 0.000 | 0.116  | 0.273  |
|                                | state_LA                           | 0.235                             | 0.033 | 0.000 | 0.170  | 0.300  |
|                                | state_MA                           | 0.078                             | 0.054 | 0.151 | -0.028 | 0.185  |
|                                | state_MD                           | 0.018                             | 0.050 | 0.711 | -0.079 | 0.116  |
|                                | state_ME                           | -0.110                            | 0.048 | 0.022 | -0.205 | -0.016 |
|                                | state_MI                           | -0.056                            | 0.046 | 0.218 | -0.145 | 0.033  |
|                                | state_MN                           | -0.088                            | 0.075 | 0.242 | -0.236 | 0.059  |

|          |        |       |       |        |        |
|----------|--------|-------|-------|--------|--------|
| state_MO | 0.022  | 0.036 | 0.549 | -0.049 | 0.092  |
| state_NC | -0.126 | 0.036 | 0.000 | -0.196 | -0.055 |
| state_NH | -0.063 | 0.042 | 0.129 | -0.145 | 0.018  |
| state_NJ | -0.352 | 0.032 | 0.000 | -0.414 | -0.289 |
| state_NV | 0.224  | 0.054 | 0.000 | 0.119  | 0.329  |
| state_NY | -0.405 | 0.057 | 0.000 | -0.516 | -0.294 |
| state_OH | 0.092  | 0.025 | 0.000 | 0.043  | 0.142  |
| state_OK | 0.349  | 0.018 | 0.000 | 0.313  | 0.385  |
| state_OR | 0.234  | 0.007 | 0.000 | 0.221  | 0.246  |
| state_PA | 0.315  | 0.024 | 0.000 | 0.269  | 0.362  |
| state_RI | 0.131  | 0.051 | 0.010 | 0.031  | 0.231  |
| state_SC | 0.047  | 0.039 | 0.221 | -0.028 | 0.123  |
| state_TN | 0.007  | 0.036 | 0.833 | -0.062 | 0.077  |
| state_TX | -0.114 | 0.050 | 0.021 | -0.212 | -0.017 |
| state_UT | 0.566  | 0.022 | 0.000 | 0.522  | 0.610  |
| state_VA | -0.282 | 0.054 | 0.000 | -0.388 | -0.175 |
| state_VT | -0.021 | 0.052 | 0.681 | -0.124 | 0.081  |
| state_WI | -0.197 | 0.053 | 0.000 | -0.301 | -0.093 |
| state_WV | 0.429  | 0.044 | 0.000 | 0.343  | 0.515  |
| _cons    | 1.971  | 0.114 | 0.000 | 1.747  | 2.195  |

state specific time trends (omitted)



**Appendix Exhibit A1. Timing of implementation and key provisions for policies related to opioid prescribing**

| State         | Key Statutory Provisions                                                  |                                            |                                                                      |                           |                                        |                                              |                                              |                             |                          |
|---------------|---------------------------------------------------------------------------|--------------------------------------------|----------------------------------------------------------------------|---------------------------|----------------------------------------|----------------------------------------------|----------------------------------------------|-----------------------------|--------------------------|
|               | Mandatory Prescription Drug Monitoring Program (PDMP) review <sup>a</sup> |                                            |                                                                      | Pain clinic laws          |                                        |                                              |                                              |                             |                          |
|               | Operational Since                                                         | Prescribers required to register with PDMP | Prescribers required to check PDMP data prior to prescribing opioids | Operational Since         | Registration, certification, licensing | Medical director required, physician on-site | Prescribing restrictions(e.g., days' supply) | Record keeping requirements | Violations and penalties |
| Ohio          | 4 <sup>th</sup> qtr, 2011                                                 | Yes                                        | Yes                                                                  | 3 <sup>rd</sup> qtr, 2011 | Yes                                    | Yes                                          | Yes                                          | Yes                         | Yes                      |
| Kentucky      | 3 <sup>rd</sup> qtr, 2012                                                 | Yes                                        | Yes                                                                  | 3 <sup>rd</sup> qtr, 2012 | Yes                                    | Yes                                          | Yes                                          | Yes                         | Yes                      |
| West Virginia | 3 <sup>rd</sup> qtr, 2012                                                 | Yes                                        | Yes                                                                  | 2 <sup>nd</sup> qtr, 2013 | Yes                                    | Yes                                          | Yes                                          | Yes                         | Yes                      |
| Tennessee     | 2 <sup>nd</sup> qtr, 2013                                                 | Yes                                        | Yes                                                                  | 3 <sup>rd</sup> qtr, 2012 | Yes                                    | Yes                                          | Yes                                          | Yes                         | Yes                      |
| Louisiana     | --                                                                        | --                                         | --                                                                   | 1 <sup>st</sup> qtr, 2007 | Yes                                    | Yes                                          | Yes                                          | Yes                         | Yes                      |
| Texas         | --                                                                        | --                                         | --                                                                   | 4 <sup>th</sup> qtr, 2009 | Yes                                    | Yes                                          | No                                           | Yes                         | Yes                      |
| Florida       | --                                                                        | --                                         | --                                                                   | 4 <sup>th</sup> qtr, 2010 | Yes                                    | Yes                                          | Yes                                          | Yes                         | Yes                      |

**NOTES:** <sup>a</sup>New York's mandated PDMP review policy was not included. It became operational in August 2013, and we lacked post-implementation data.

**NOTES:** States not implementing mandatory PDMP review or pain clinic laws during our study period: Alabama, Arizona, California, Colorado, Connecticut, Washington D.C., Delaware, Georgia, Iowa, Illinois, Indiana, Kansas, Massachusetts, Maryland, Maine, Michigan, Minnesota, Missouri, North Carolina, New Hampshire, New Jersey, Nevada, New York, Oklahoma, Oregon, Pennsylvania, Rhode Island, South Carolina, Utah, Virginia, Vermont, and Wisconsin.
